# Supplementary material for: LncRNAs H19 and HULC, activated by oxidative stress, promote cell migration and invasion in cholangiocarcinoma through a ceRNA manner
Source: Springer Nature journal article supplement (doi:10.1186/s13045-016-0348-0), 2016-11-03
Supplement: MOESM1 [file 11015492]

LncRNAs H19 and HULC, activated by oxidative stress, **promote** cell migration and invasion in cholangiocarcinoma through a ceRNA manner

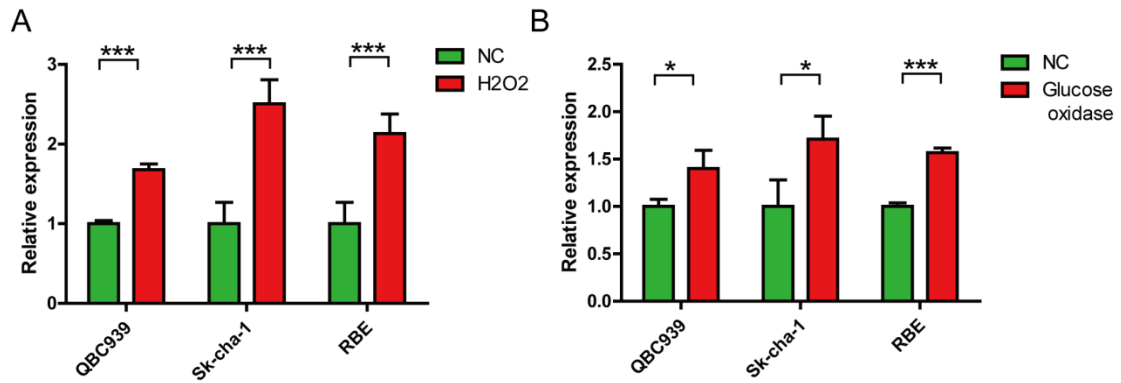

**Figure S1.** The expression of heme oxygenase-1(HO-1) had increased significantly under the oxidative stress condition. HO-1 stimulated by short-term oxidative stress using H<sub>2</sub>O<sub>2</sub> (A) and long-term oxidative stress using glucose oxidase (B) in QBC939, SK-cha-1 and RBE cells.

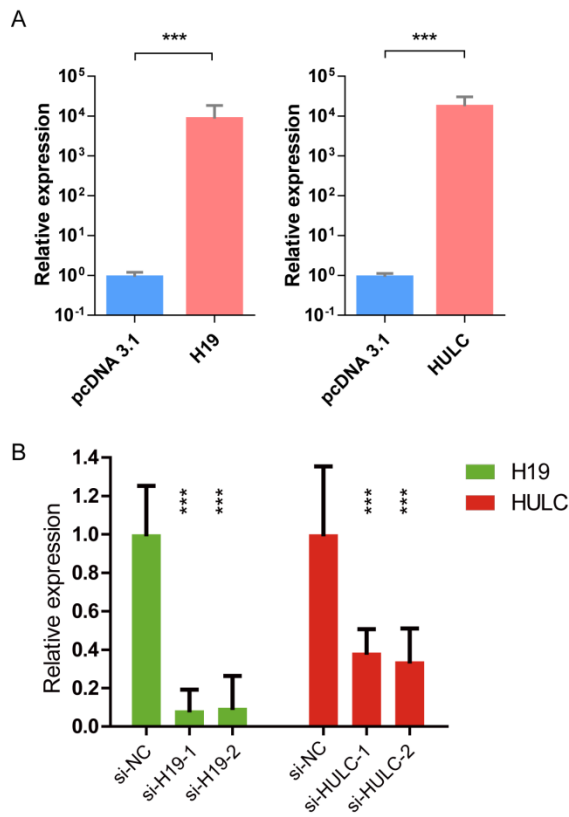

**Figure S2.** qPCR validations of forced expressed H19 and HULC in CCA cells (A), and knockdown of lncRNAs, H19 and HULC in RBE cells by SiRNAs.

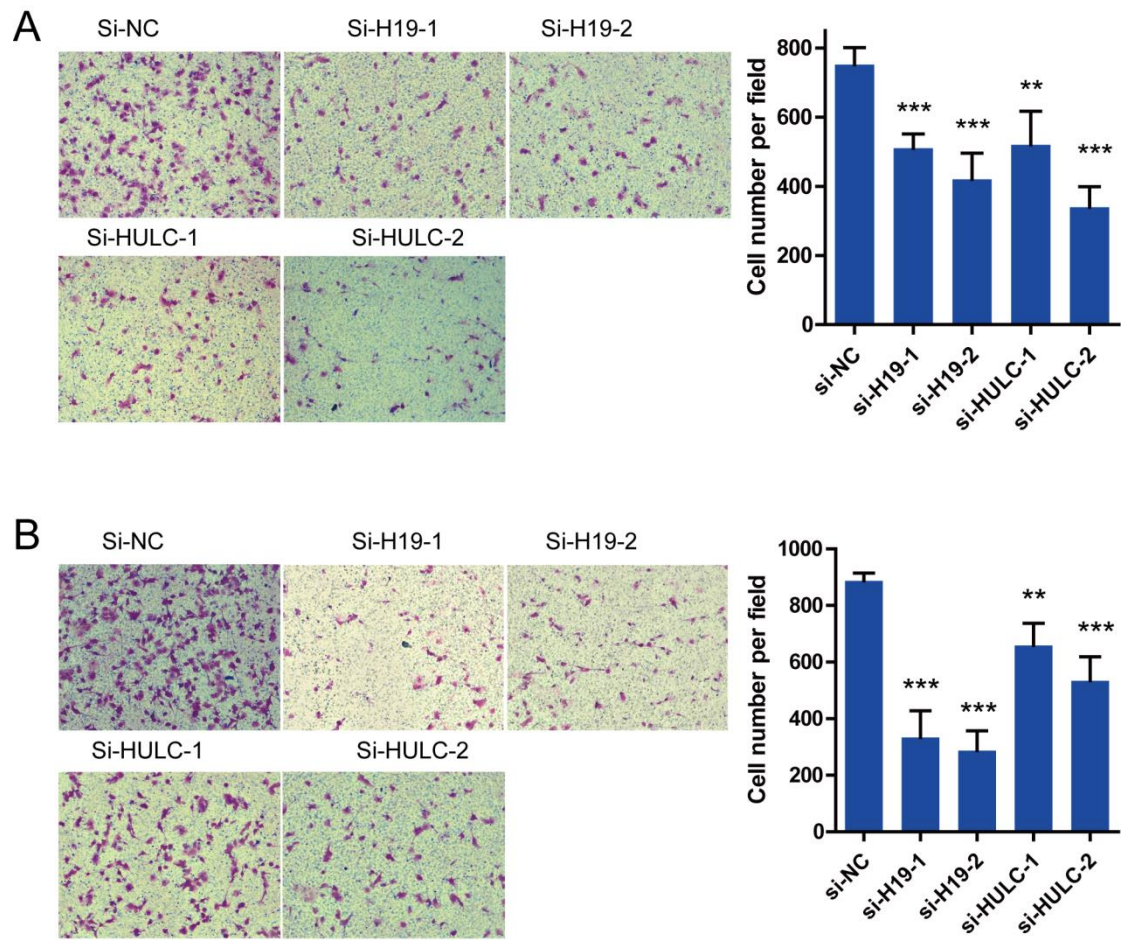

**Figure S3. Knockdown of H19 and HULC expression decreased the ability of migration and invasion in CCA cells.**

A. Migration assays of CCA cells. B. Invasion assays of CCA cells.

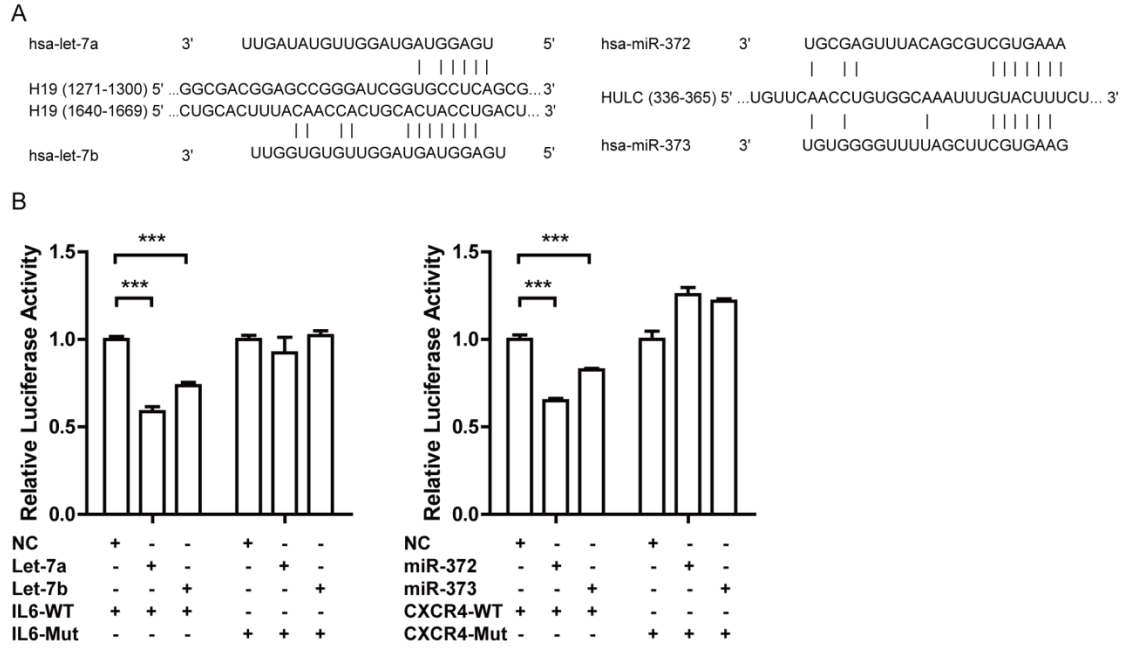

**Figure S4.** MiRNAs targeted Inflammation associated genes, IL6 and CXCR4. A. Schematic representation of the interaction between miRNAs and H19 or HULC. B. Let-7a/let-7b and miR-372/miR-373 suppressed luciferase activity of vectors with 3' UTR of IL6 and CXCR4 in RBE cells.

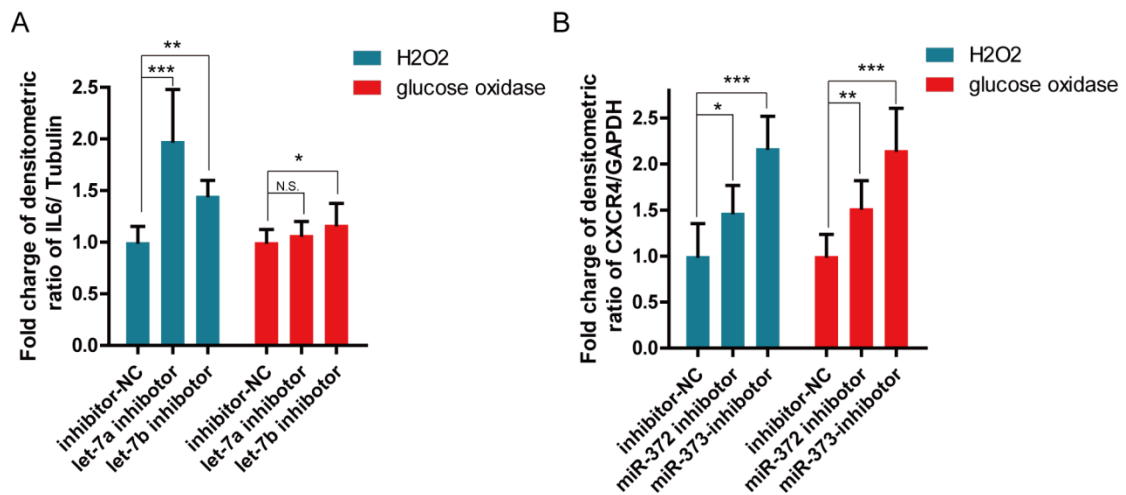

**Figure S5.** The histogram of miRNA downregulation by transfecting the miRNA inhibitors into RBE cells under oxidative stress. The expression levels of IL6 (A) and CXCR4 (B) increased significantly.

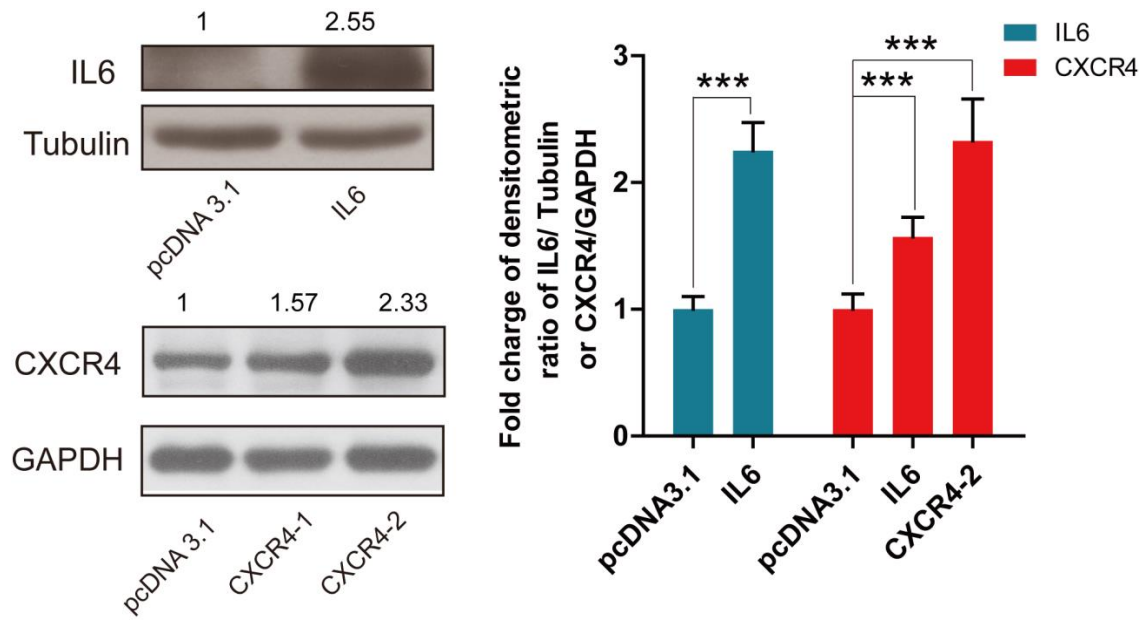

**Figure S6.** Western Blot validations of forced expressed IL6 and CXCR4 in CCA cells. CXCR4-1 and CXCR4-2 represent two alternative splicing of CXCR4. The right histogram of relative gray values represented the protein level.

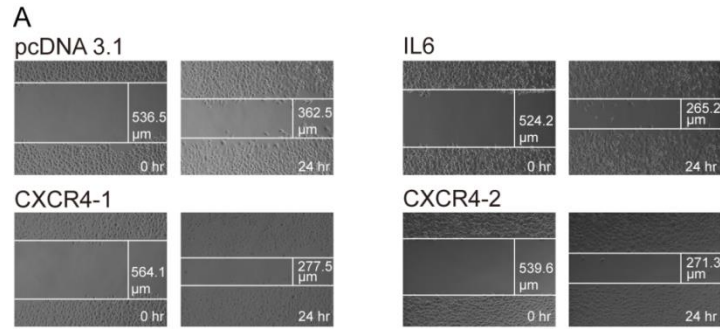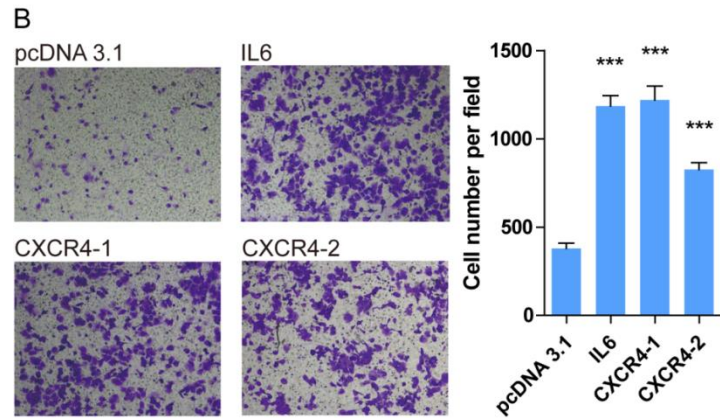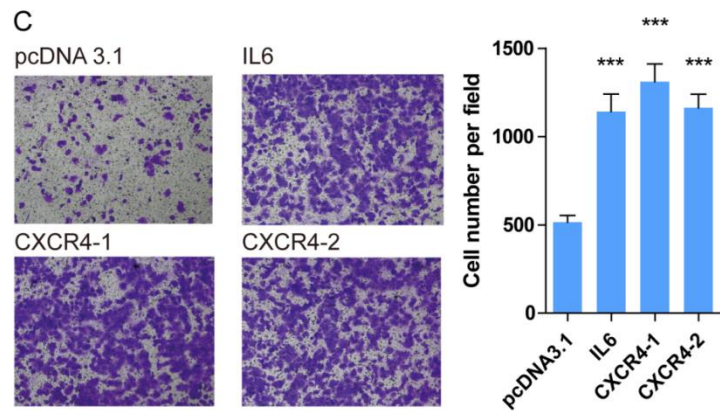

**Figure S7.** Enforced IL6 and CXCR4 expression increased the ability of invasion in CCA cells. A Scratch wound healing assays of CCA cells. B Migration assays of CCA cells. C Invasion assays of CCA cells.

**Table S1.** Primer sequence for qPCR and vector construction.

| Primer Name             | Sequence 5' to 3'         |
|-------------------------|---------------------------|
| <b>Primers for qPCR</b> |                           |
| qHULC-Forward           | GCAAGCCAGGAAGAGTCGTC      |
| qHULC-Reverse           | GCTGTGCTTAGTTTATTGCCAGG   |
| qH19-Forward            | TTCCAGGCAGAAAGAGCAAGAGGGC |
| qH19-Reverse            | AGACGTCCTGCTGCAACTCCCGAG  |
| qIL6-Forward            | GGTACATCCTCGACGGCATCTC    |
| qIL6-Reverse            | CTCTGGCTTGTTCTCACTACT     |

---

|                |                       |
|----------------|-----------------------|
| qCXCR4-Forward | CACGCCACCAACAGTCAGA   |
| qCXCR4-Reverse | ACAATACCAGGCAGGATAAGG |
| qGAPDH-Forward | GCTGAACGGGAAGCTCACTG  |
| qGAPDH-Reverse | GTGCTCAGTGTAGCCCAGGA  |
| qHO-1- Forward | CAACATTGAGCTGTTTGAGG  |
| qHO-1- Reverse | TGGTCTTTGTGTTCTCTGTC  |

**Primers for full-length amplification**

|                 |                                      |
|-----------------|--------------------------------------|
| HULC-Forward    | AGTCGAATTCATGGGGGTGGAACCTCATGATGGAAT |
| HULC-Reverse    | GATCCTCGAGTTAAGAATGGACATCATTTTATTTTC |
| IL6-Forward     | CGCGGATCCAGGACTGGAGATGTCTGAGGCT      |
| IL6-Reverse     | CCGGAATTCTGATCTGGCTCTGAAACAAAGG      |
| CXCR4-1-Forward | AGTCGAATTCATGGAGGGGATCAGTATA         |
| CXCR4-2-Forward | AGTCGAATTCATGTCCATTCCTTTGCCT         |
| CXCR4-Reverse   | GATCCTCGAGTTAGCTGGAGTGAAAACCTTG      |

**Oligonucleotides for 3' UTR construction**

|                               |                                                                 |
|-------------------------------|-----------------------------------------------------------------|
| CXCR4-miR372373-WT-Sense      | TCGAGCTTAAGACGTGATTTTGCTGTAGAAGATGGCAC<br>TTATAACCAAAGCCCAAAGGC |
| CXCR4-miR372373-WT-Antisense  | GGCCGCCTTTGGGCTTTGGTTATAAGTGCCATCTTCTA<br>CAGCAAATCACGTCTTAAGC  |
| CXCR4-miR372373-Mut-Sense     | TCGAGCTTAAGACGTGATTTTGCTGTAGAAGATGGTAT<br>TCATAACCAAAGCCCAAAGGC |
| CXCR4-miR372373-Mut-Antisense | GGCCGCCTTTGGGCTTTGGTTATGAATACCATCTTCTA<br>CAGCAAATCACGTCTTAAGC  |
| IL6-let7ab-WT-Sense           | TCGAGCCAGATCATTTCTTGAAAGTGTAGGCTTACCT<br>CAAATAAATGGCTAACTTAGC  |
| IL6-let7ab-WT-Antisense       | GGCCGCTAAGTTAGCCATTTATTTGAGGTAAGCCTACA<br>CTTTCCAAGAAATGATCTGGC |
| IL6-let7ab-Mut-Sense          | TCGAGCCAGATCATTTCTTGAAAGTGTAGGCTTTTCGT<br>GAAATAAATGGCTAACTTAGC |
| IL6-let7ab-Mut-Antisense      | GGCCGCTAAGTTAGCCATTTATTTACGAAAGCCTACA<br>CTTTCCAAGAAATGATCTGGC  |

---
